# Supplementary material for: Dynein self-organizes while translocating the centrosome in T-cells
Source: PubMed Central journal article supplement — Mol Biol Cell. 2021 Apr 19;32(9):855–68. doi: 10.1091/mbc.E20-10-0668 (PMC8108531; doi:10.1091/mbc.e20-10-0668), 2021-04-19

# Supplemental Materials

*Molecular Biology of the Cell*

Gros et al.

## Legends for supplemental figures and videos

**Supplemental Figure 1.** All time points represent the time in phase III. (A) Traces of the distance between the centrosome and the synapse as a function of time in a model without any dynein molecules. Colors indicate different simulations. (B) Traces of the radial distance from the centrosome to the central axis of the cell as a function of time in a model without any dynein. Colors indicate different simulations. (C) Traces of the distance between the centrosome and the synapse as a function of time in a model without actin confining dynein to the synapse. In this model, dynein is attached to the surface of the MT-bounding volume and thus it is not in a separate space from the MTs.

**Supplemental Figure 2.** Force in Y on dynein in phase III. The positions of dynein molecules at all time points in phase III are shown and the force magnitude in Y on dynein is encoded by the color gradient. A positive force is directed towards the centrosome, a negative force points into the membrane. The boundary of the 14  $\mu\text{m}$ -diameter synapse is represented by a red circle and the boundary of the 8  $\mu\text{m}$  diameter area of initialization by a red dashed line. This initialization area is roughly comparable to the edge of the MT binding region. Two example simulations per drag coefficient are shown in the two rows.

**Supplemental Figure 3.** All time points represent the time in phase III. (A) Traces of the position of the centrosome as a function of time in the in the XZ plane to the central axis for MT-capture-shrinkage dynein and in (B) for MT-sliding dynein. Different colors indicate different values of the unbinding rate  $k_{\text{detach}}$ . (C) The number of dynein molecules in the biggest cluster of dyneins as a function of time, for the runs with MT-sliding dynein. The colors encode different runs of our simulations. To reduce the noise, we average the trajectories over a window of 1.6 seconds and show the 95% confidence interval as the shaded area. For each panel we changed the numerical value of the unbinding rate as given on the top.

**Supplemental Video V1** A side view of a full simulation run with 1 pN·s/ $\mu\text{m}$  drag on dynein, snapshots are shown in Figure 1E.

**Supplemental Video V2** Views of phase III for all drag conditions, shown from under the synapse. The dynein movement of these runs is shown in the top row in Figure 3B.

**Supplemental Video V3** Video showing the 3D volume of the TREx T cell data.

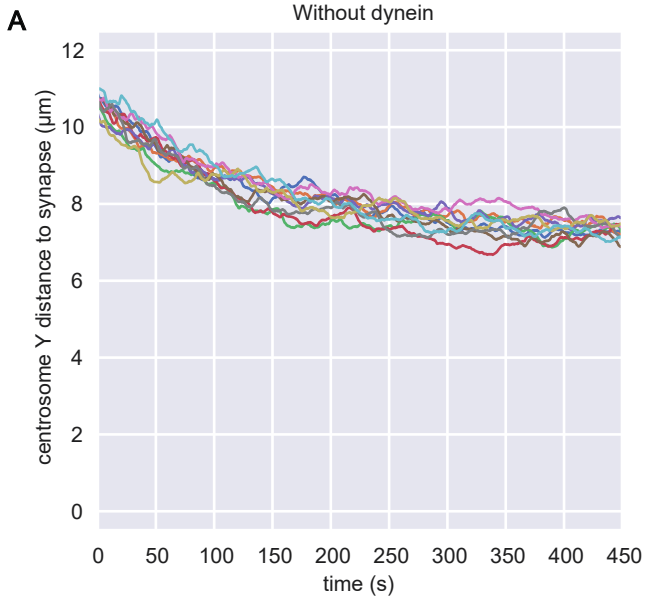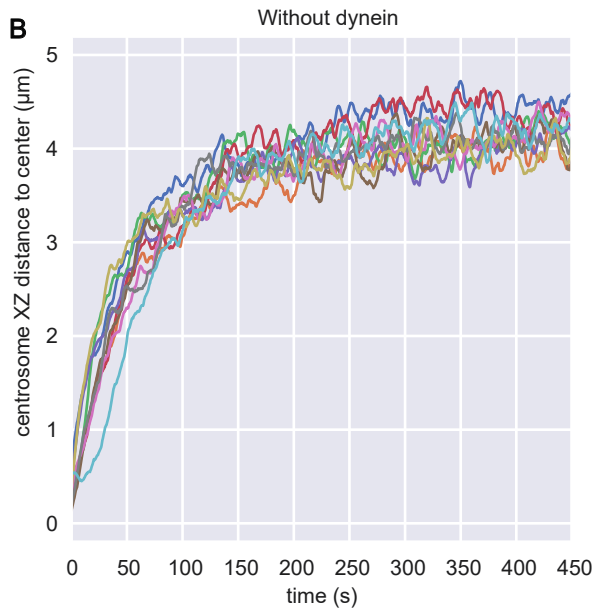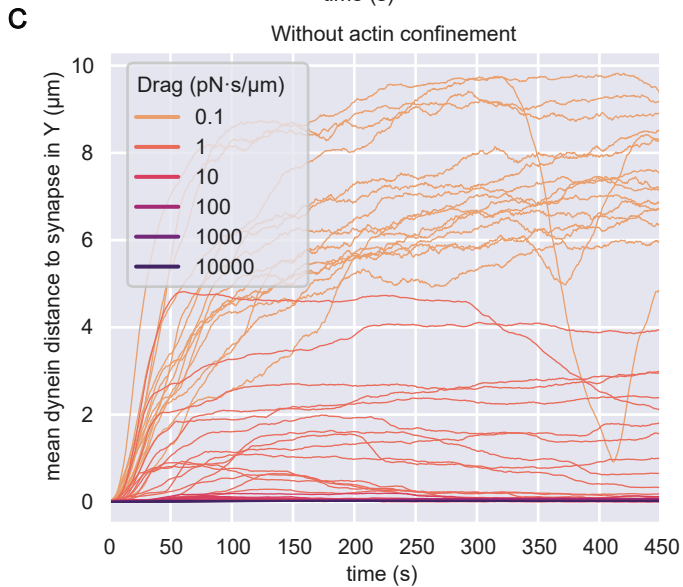

Force in Y (pN)

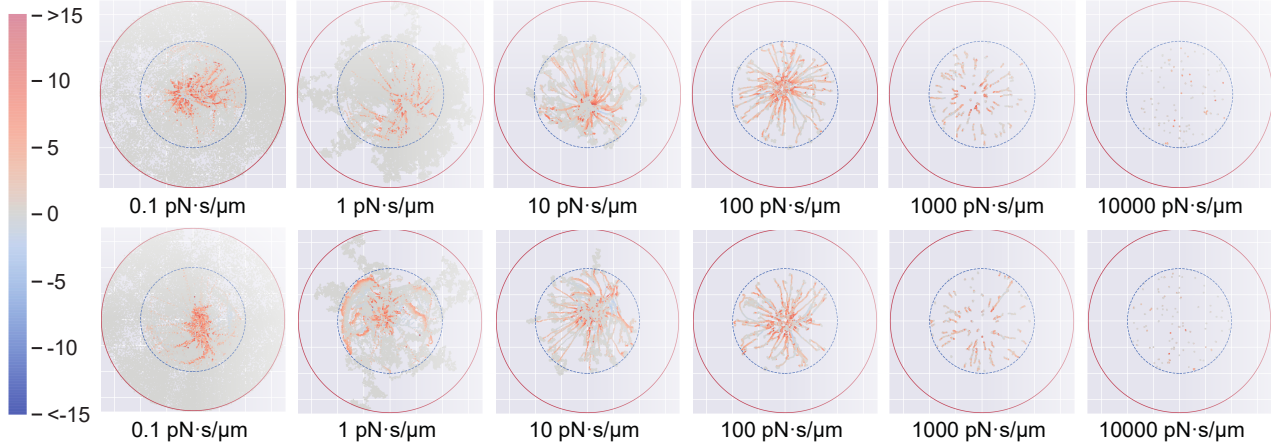



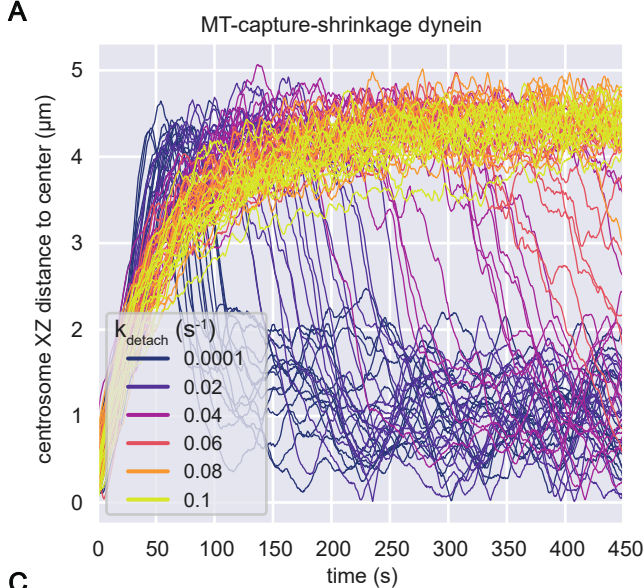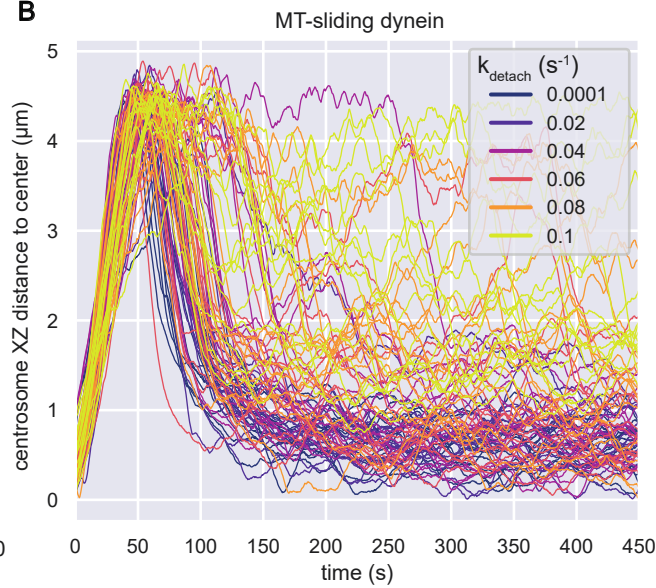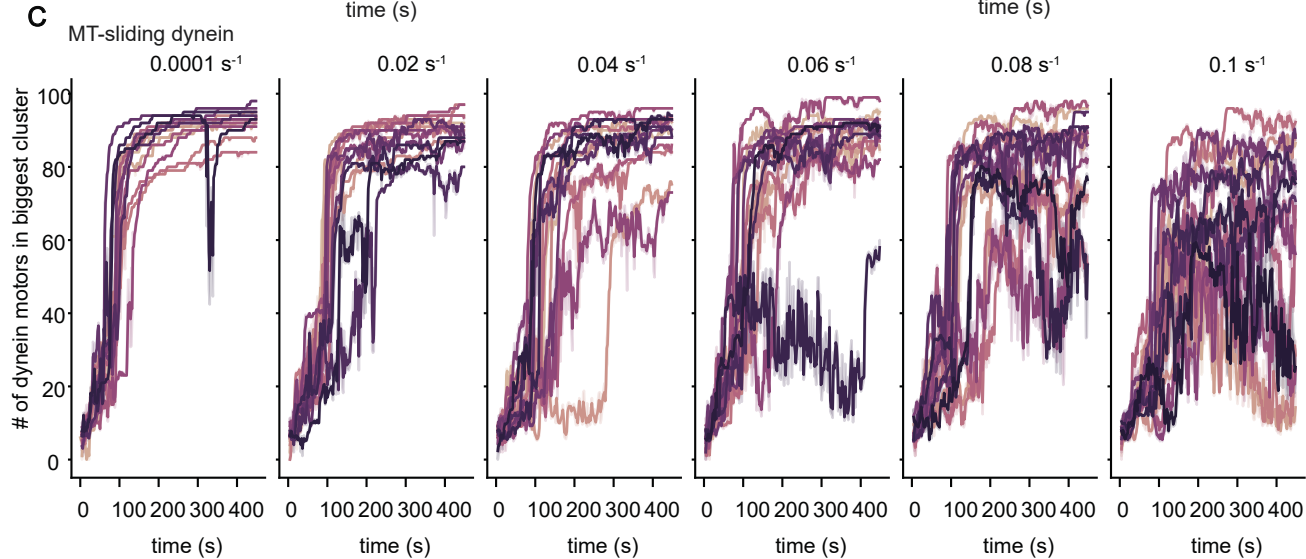

Supplement: mbc-32-855-s001.pdf [file mbc-32-855-s001.pdf]
